# Supplementary material for: The association between remnant cholesterol and bone mineral density in US adults: the National Health and Nutrition Examination Survey (NHANES) 2013–2018
Source: PubMed Central journal article supplement (PMC11102129; doi:10.1186/s12944-024-02145-6), 2024-05-18
Supplement: 12944_2024_2145_MOESM2_ESM.pdf [file 12944_2024_2145_MOESM2_ESM.pdf]

# btgg4dyBvR

*By* 000000 00000

1 **<sup>7</sup> The association between remnant cholesterol and bone mineral density in US adults: The National**  
2 **Health and Nutrition Examination Survey (NHANES) 2013-2018.**

3

4 **Abstract**

5 **Background**

6 Previous evidence showed a possible link of dyslipidemia with bone health. Nevertheless, the correlation of remnant cholesterol <sup>5</sup>(RC) with  
7 <sup>12</sup>bone mineral density (BMD) has yet to be well investigated. This study investigated the association of RC with total spine BMD in general  
8 Americans.

9 **Methods:**

10 <sup>12</sup>This study explored the relationship of RC with total spine BMD in <sup>1</sup>subjects aged  $\geq$  20 years from the National Health and Nutrition  
11 Examination Survey (NHANES) 2013-2018. After adjusting for covariates, <sup>26</sup>multivariate linear regression and stratified analyses were  
12 <sup>3</sup>conducted to determine the correlation of serum RC with total spine BMD in adult Americans. Restricted cubic spline (RCS) was applied  
13 to examine the nonlinear association of serum RC with total spine BMD.

14 **Results:**

15 This study included 3815 individuals  $\geq$  20 years old, 1905 (49.93%) of whom were men and 1910 (50.07%) of whom were women. After  
16 adjusting for all covariates, the results showed a negative relationship of serum RC <sup>4</sup>with total spine BMD ( $\beta = -0.024$ , 95% CI: -0.039, -  
17 0.010). The interaction tests of age, sex, race, and BMI showed no statistically significant effects on the association. The RCS also indicated  
18 a negative linear correlation of serum RC with total spine BMD (nonlinear  $P = 0.068$ , overall  $P < 0.001$ ). Moreover, RC had a stronger effect  
19 <sup>8</sup>on total spine BMD than total cholesterol (TC), low-density lipoprotein cholesterol (LDL-C), and high-density lipoprotein cholesterol  
20 (HDL-C).

21 **Conclusions:**

22 This study found that serum RC was negatively related to total spine BMD in U.S. adults. These findings emphasized the important role of  
23 RC in bone health in American adults.

24

25

26

27

28

29

30

31

32

33

34

35

36 **Keywords: Bone mineral density; Remnant cholesterol; Americans; NHANES.**

### 37 **Introduction**

38 Osteoporosis, a common skeletal disorder in elderly individuals, is featured by low <sup>1</sup>bone mineral density (BMD) and high fragility fracture  
39 risk[1]. A recent study indicated that 19.7% of the world's population older than 50 years is suffering from osteoporosis[2]. As the population  
40 ages globally, this number still continues[3]. The increasing prevalence of osteoporosis is leading to high morbidity and mortality in elderly  
41 people around the world, placing significant health and economic burdens on society[3]. The development of osteoporosis can be attributed  
42 to two factors. The first aspect is the peak bone mass (PBM) accumulation during puberty, and the second is the bone mass loss in old  
43 age[4,5]. Bone mass loss can be determined by various factors, including genetics, environment, diet, and others[5,6]. Therefore, to reduce  
44 the high morbidity and mortality caused by osteoporosis in elderly individuals, it is essential to recognize and manage modifiable factors  
45 that contribute to osteoporosis.

46 Dyslipidemia is commonly observed in patients with osteoporosis and is thought to affect BMD by impairing circulation[7-9]. In a study  
47 of 4323 Koreans, Kim et al.[7] reported that serum triglyceride levels were negatively related to BMD in men aged > 50 years and  
48 postmenopausal women. Cao et al.[8] indicated that total cholesterol (TC) was negatively related to total BMD in U.S. young  
49 adults. Although several <sup>5</sup>studies have demonstrated that triglyceride, low-density lipoprotein cholesterol (LDL-C), and TC are negatively  
50 correlated with BMD, the findings are not always consistent[10-12]. These inconsistent results limit the clinical utility of lipid biomarkers.  
51 There is an urgent need to explore new lipid parameters to predict osteoporosis and intervene.

52 Residual cholesterol (RC), the cholesterol in triglyceride-rich lipoproteins, is associated with various diseases, including metabolic,  
53 cardiovascular, and other disorders[13-15]. RC was shown to be an equal or even more reliable cardiovascular disease predictor than LDL-  
54 C or TC[16]. Although the role of RC in cardiovascular disease has been widely investigated, few studies have investigated the role of RC  
55 in bone health. An early study suggested that a reduction in the <sup>14</sup>uptake of triglyceride-rich lipoproteins by osteoblasts leads to <sup>14</sup>increased  
56 <sup>2</sup>bone formation in mice[17]. In a northern Chinese cohort of 7,053 participants, Hou et al.[18] found that serum RC was negatively  
57 associated with BMD in men younger than 60 years after adjustment for a range of confounding factors. Therefore, RC may serve as a new  
58 marker of lipid metabolism to influence bone metabolism and BMD.

59 However, the relationship of RC with BMD has not been assessed in women or older people. In addition, no study has explored their  
60 relationship in Americans. Thus, <sup>27</sup>this study aimed to assess the correlation of serum RC with total spine BMD in Americans <sup>18</sup>aged ≥ 20 years  
61 from the National Health and Nutrition Examination Survey (NHANES) 2013-2018. We hypothesized that the serum RC is negatively  
62 related to total spine BMD.

### 63 **Methods**

#### 64 **Study design**

65 The NHANES is a national nutrition and health program that collects and publicly releases data biennially in the United States. In detail,

66 <sup>9</sup> the National Center for Health Statistics Ethics Review Committee provided ethical consent for the NHANES program. Each participant  
67 or their guardians signed informed consent forms for the NHANES programs. The latest three NHANES cycles were combined: 2013-  
68 2014, 2015-2016, and 2017-2018. Individuals aged 20 years or older were enrolled in this study. Initially, 29400 individuals were enrolled  
69 in the NHANES 2013–2018. Then, 12343 subjects were excluded because they were younger than 20 years, 8318 participants were  
70 excluded because of missing information on lumbar spine BMD, and 4924 participants were excluded because of missing RC information.  
71 Finally, 3815 individuals were enrolled in this study. The participant selection flowchart is displayed in Figure 1.

## 72 **Assessment of RC and BMD**

73 RC was used as the exposure variable in this study. Peripheral blood was drawn from the subjects for analysis after they fasted for at least  
74 eight hours in the morning. Serum triglyceride and TC levels were analyzed using the enzymatic method. Serum HDL-C was assessed by  
75 heparin-manganese precipitation or a direct immunoassay technique method. Serum LDL-C was measured by the Friedwald calculation.  
76 Serum RC was determined using the formula [RC= TC- LDL-C - HDL-C], which was in accordance with previous research[19,20].  
77 <sup>19</sup> The total spine BMD was assessed by dual-energy X-ray absorptiometry (DXA) using Hologic densitometers. Professionals collected and  
78 standardized BMD data. Total spine BMD was used as an outcome variable in this analysis. Detailed information on BMD can be found in  
79 the DXXLSBMD datasets on the NHANES website[21].

## 80 **Covariates**

81 Covariates were chosen based on the published study[22]. Variables such as race, <sup>20</sup> age, sex, body mass index (BMI), blood urea nitrogen,  
82 total protein, serum calcium, serum vitamin D, serum phosphorus, serum uric acid, <sup>4</sup> poverty income ratio (PIR), education level, smoking  
83 and drinking behaviors, high pressure, diabetes, physical activities, and statin use were considered in the study. The PIR is a widely used  
84 indicator of family income. <sup>16</sup> BMI was determined by dividing weight (in kilograms) by the square of height (in metres). Races were divided  
85 into five groups (Other Hispanic, <sup>22</sup> Non-Hispanic Black, Mexican American, Other Race, and Non-Hispanic White). Education level was  
86 categorized into three categories (College degree or above, High school graduate, and Under high school). Total protein, blood urea nitrogen,  
87 serum total calcium, serum phosphorus, serum uric acid, and serum vitamin D were collected via laboratory measurements. Smoking and  
88 drinking behaviors, high pressure, diabetes, physical activities, and statin use were determined by questionnaires: Smoke at least 100  
89 cigarettes in life? Have you ever had 5 or more drinks every day? Doctor told you had high blood diabetes? Ever told you had high blood  
90 pressure? How many days did you do moderate recreational activities in a typical week? Have you taken statins in the past 30 days?  
91 Detailed data on covariates can be seen at the NHANES website.

## 92 **Statistical analysis**

93 The present study used the mean ± standard deviation and percentages to represent <sup>29</sup> continuous and categorical variables, respectively. The  
94 characteristics of participants were described based on serum RC quartile <sup>3</sup> (Q1: ≤ 0.308 mmol/L, Q2: 0.309-0.464 mmol/L, Q3: 0.465-0.699  
95 mmol/L, Q4: ≥ 0.700 mmol/L). To compare differences between the characteristics of participants, the study used weighted linear regression  
96 models and weighted  $\chi^2$  tests for <sup>15</sup> continuous variables and categorical variables, respectively. Furthermore, multivariate linear regression  
97 analyses were performed to explore the relationship of RC with total spine BMD. Model 1 was built as an unadjusted model. Then, Model  
98 2 was created by adjusting age, race, and sex. Finally, Model 3 was created by adjusting all variables of race, age, sex, BMI, blood urea

99 nitrogen, total protein, serum calcium, serum vitamin D, serum phosphorus, serum uric acid, PIR, education level, smoking and drinking  
100 behaviors, high pressure, diabetes, physical activities, and statin use. Then, the continuous variable serum RC was changed to a categorical  
101 variable (quartiles) to detect the correlation of RC with BMD. Stratified analyses and interaction tests were performed by sex (men and  
102 women), age (<50 and ≥50), race (Other Hispanic, Non-Hispanic Black, Mexican American, Other Race, and Non-Hispanic White), and  
103 BMI (<25, 25-30, >30). To explore the effect of menopause on this relationship, further stratified analyses of menopausal women  
104 (premenopausal women and postmenopausal women) were conducted. Menopause was defined as the absence of menstruation in the past  
105 year because of hysterectomy or natural menopause/life change reasons[23]. The nonlinear association between RC and total spine BMD  
106 was detected by restricted cubic spline (RCS). All analyses were conducted by EmpowerStats (4.0) and R software (4.3.1) using MEC  
107 weight. A  $P$  value < 0.05 was deemed to indicate statistical significance.

## 108 Results

### 109 Baseline characteristics

110 A sample of 3815 subjects ≥ 20 years old were recruited for the present analyses; 1905 (49.93%) were men, and 1910 (50.07%) were  
111 women, with an average age of  $39.78 \pm 11.51$  years. In the final analyses, 34.36% were Non-Hispanic White, 20.73% were Non-Hispanic  
112 Black, 18.77% were Other Race, 15.20% were Mexican American, and 10.93% were Other Hispanic. The mean serum RC of participants  
113 was 0.56 mmol/L. Individuals with higher RC were more likely to be women, older, Non-Hispanic White, Mexican American, less educated,  
114 poor, frequent smokers, diabetic, and hypertensive. They used more statins and had higher BMIs; serum uric acid, serum calcium, blood  
115 urea nitrogen, and serum vitamin D levels; and lower total spine BMD (Table 1).

### 116 Associations of serum RC with total spine BMD

117 Models 1 and 2 revealed a negative association of RC with total spine BMD (Table 2). In Model 3, a negative correlation was also observed  
118 between serum RC and total spine BMD ( $\beta = -0.024$ , 95% CI: -0.039, -0.010). Figure 2 showed the smooth curve fittings of the correlation  
119 of serum RC with total spine BMD. Then, the continuous variable of RC was changed to a categorical variable (quartiles). According to  
120 Model 3, subjects in the highest quarter of serum RC have a significantly reduced BMD compared to subjects in the first quarter. ( $\beta = -$   
121  $0.024$ , 95% CI: -0.038, -0.010). Figure 3 showed the results of RCS. Consistent with the findings of the multivariate linear regression  
122 analyses, the dose-response association also indicated a negative linear association of serum RC with total spine BMD (nonlinear  $P = 0.068$ ,  
123 overall  $P < 0.001$ ) (Figure 3).

### 124 Stratified analysis and interaction testing

125 Stratified analysis and interaction tests were conducted for age, sex, race, and BMI (Table 2). The interaction tests showed that those  
126 subgroups had no significant effect on the relationship ( $P$  for interaction > 0.05). In Model 3, the results revealed a negative correlation of  
127 RC with total spine BMD in men ( $\beta = -0.030$ , 95% CI: -0.050, -0.011) but not in women ( $\beta = -0.011$ , 95% CI: -0.034, 0.012). However,  
128 no interaction effect was found ( $P$  for interaction = 0.173). For race, the results found the negative association was stronger in Non-Hispanic  
129 White ( $\beta = -0.030$ , 95% CI: -0.053, -0.007) than others. Nevertheless, the results found no interaction effect ( $P$  for interaction = 0.767).  
130 For age groups, the results showed a negative association of RC with total spine BMD in individuals aged <50 years ( $\beta = -0.033$ , 95% CI:  
131 -0.049, -0.016) but not in individuals aged ≥ 50 years ( $\beta = -0.010$ , 95% CI: -0.039, 0.019). ( $P$  for interaction = 0.148). For all three

132 BMI groups, the results indicated a negative correlation of serum RC with total spine BMD: BMI < 25: ( $\beta = -0.030$ , 95% CI: -0.042, -0.018);  
133  $25 \leq \text{BMI} \leq 30$ : ( $\beta = -0.033$ , 95% CI: -0.057, -0.010); BMI > 30: ( $\beta = -0.021$ , 95% CI: -0.044, -0.003). Further stratified analyses were  
134 conducted by menopause status in women (Appendix 1). The results showed that menopause status has no interaction effect on the  
135 correlation of serum RC with total spine BMD in women ( $P$  for interaction = 0.582).

#### 136 **The effect of TC, LDL-C, HDL-C, and RC on total spine BMD**

137 The effects of RC and classical lipid composition on total spine BMD were compared (Table 3). RC had a greater impact on BMD than did  
138 TC, LDL-C, or HDL-C. According to the fully adjusted model, every unit increase in TC, LDL-C, and RC was related to decreases in total  
139 spine BMD of 0.010, 0.013, and 0.024 g/cm<sup>2</sup>, respectively. Every unit increase in HDL-C was related to a 0.022 g/cm<sup>2</sup> increase in total  
140 spine BMD.

#### 141 **Discussion**

142 This study firstly explored the correlation of serum RC with BMD in U.S. adults. The results showed a negative correlation of serum RC  
143 with total spine BMD in Americans aged  $\geq 20$  years old. The interaction tests showed that the age, sex, race, and BMI subgroups had no  
144 significant effect on the relationship. Dose-response analysis by RCS also confirmed a negative linear relationship between serum RC and  
145 BMD. These findings emphasize the critical role of RC in bone health.

146 RC includes cholesterol in very low-density lipoproteins (VLDLs), cholesterol in chylomicron residue in the postprandial state, and intermediate-  
147 density lipoproteins (IDLs) in the fasting state. Many recent NHANES studies have identified RC as a biomarker of various diseases [24-  
148 27]. In a survey of 7777 subjects from the NHANES 1999-2008, Yan et al. [24] reported a positive association between serum RC and  
149 rheumatoid arthritis (RA). Thus, RC may serve as an essential predictor of RA occurrence. Zhang et al. [25] found that RC was positively  
150 associated with cardiovascular mortality in a cohort of 19650 individuals from the NHANES 1999-2014. This positive association  
151 was independent of traditional risk factors like HDL-C and LDL-C. He et al. [26] established a link between RC and albuminuria or renal  
152 function. They found a negative correlation between serum RC and eGFR ( $\beta = -2.12$ , 95% CI: -3.04, -1.21). Xie et al. [19] observed that  
153 serum RC was negatively associated with memory function and verbal learning in individuals aged  $\geq 60$  years. Therefore, lower levels of  
154 RC may be beneficial for preventing cognitive impairment in older adults. In another study by Chen et al. [27], a nonlinear association  
155 between RC and nonalcoholic fatty liver disease (NAFLD) was found. Risk ratios for NAFLD on the left and right sides of the inflection  
156 point are 3.88 (95% CI: 2.43-6.2) and 0.59 (95% CI: 0.21-1.71). Nevertheless, the possible link between RC and BMD has not been well  
157 explained. Hou et al. [18] investigated the correlation of RC with BMD in 7053 Chinese men, and they indicated that serum RC was  
158 negatively related to hip BMD. Every one mmol/l increase in RC was related to a 0.0079 g/cm<sup>2</sup> decrease in hip BMD. Furthermore,  
159 compared with people of the lowest serum RC quartile, people of the highest serum RC quartile have a 1.43-fold risk of low bone mass.  
160 However, the subjects in this study were only middle-aged men. It is well known that advanced age and women are high-risk factors for  
161 osteoporosis. Therefore, the correlation of RC with BMD in older people and women is still unknown. This study first indicated a negative  
162 correlation of RC with BMD in Americans  $\geq 20$  years. Furthermore, the interaction tests showed that age and sex have no interaction effects  
163 on the final results ( $P$  for interaction > 0.05). Thus, RC may serve as a novel lipid metabolism marker to predict bone health in the population.  
164 Although no studies have investigated the mechanisms of RC in bone metabolism, many basic investigations have assessed the impacts of

165 classical lipid metabolism on bone health. Overall, the effect of abnormal lipid metabolism on bone health is complex and involves several  
166 factors. Both osteoblasts and adipocytes are derived from the differentiation of mesenchymal stem cells (MSCs)[28]. The Wnt/ $\beta$ -catenin  
167 signalling pathway regulates this differentiation process[29]. When this pathway is blocked, MSCs will favour adipocyte differentiation.  
168 In a study by Pelton et al.[30], after four months of feeding, mice fed a high-cholesterol diet showed significantly reduced femoral and  
169 cranial BMD compared to those fed a low- or no-cholesterol diet. They also suggested that high cholesterol intake could inhibit osteoblast  
170 differentiation and enhance osteoclast function in mice[30]. Furthermore, high TC and LDL-C can increase bone marrow microcirculatory  
171 stress and decrease bone vascularization, leading to bone loss[31].

172 Epidemiological studies have also widely discussed <sup>17</sup>the relationship between lipid profiles and BMD. Most studies <sup>17</sup>showed a negative or  
173 no <sup>28</sup>correlation of LDL-C and TC with BMD[7,32,33]. The adverse <sup>28</sup>effects of LDL-C and TC on bone health can often be attributed to  
174 vascular calcification and atherosclerosis[34,35]. However, studies showed a positive, negative, or no correlation between HDL-C and  
175 BMD[36-39]. In a study by Sun et al.[38], their survey indicated that HDL-C was negatively related to lumbar BMD after adjusting a large  
176 range of confounders. However, Zolfaroli et al.[39] found a positive correlation of HDL-C with total spine and femur neck BMD in  
177 postmenopausal females. These differences may be explained in part by differences in study population, study methodology, or error control.  
178 In total, the relationship between traditional lipid profiles and BMD has been controversial in previous studies. This study identified a  
179 negative association of serum RC, TC, and LDL-C with total spine BMD in U.S. adults, with the effect of RC being stronger. In contrast,  
180 HDL-C was found to have a positive association. Thus, RC could be a new predictor of low BMD in clinical practice.

#### 181 **Strengths and limitations**

182 The study has a variety of strengths. First, this study firstly accessed the correlation of RC with BMD in U.S. adults. The study used data  
183 from the recent cycles in the NHANES 2013-2018, which represent the general American population. Second, this study suggested that  
184 RC may serve as a new bone health marker, revealing the importance of lipid metabolism disorders in the mechanisms of bone loss. Third,  
185 linear regression analyses were conducted after adjusting for a large number of confounders. In addition, the nonlinear RCS test made the  
186 results more reliable.

187 <sup>23</sup>The present study also has several limitations. First, some confounders in this study were collected through questionnaires and recall, which  
188 may suffer from recall bias and lead to inaccuracies. Second, although the study adjusted for many confounders, there remains the  
189 possibility of residual confounding. Third, the results cannot be used to make causal inferences because of the nature of cross-sectional  
190 studies. Further prospective studies are required to validate their causal inferences.

#### 191 **Conclusions**

192 This study indicated a negative correlation of serum RC with total spine BMD in U.S. adults. Moreover, RC showed a stronger effect on  
193 total spine BMD than TC, LDL-C, and HDL-C. The finding emphasized the important role of RC in bone health in Americans. RC may be  
194 a new indicator for the early detection and prevention of osteoporosis.

195

# 13%

SIMILARITY INDEX

## PRIMARY SOURCES

- 1** [www.science.gov](http://www.science.gov) 46 words — 1%  
Internet
- 2** Aiyong Cui, Peilun Xiao, Baoliang Hu, Yuzhuo Ma, Zhiqiang Fan, Hu Wang, Fengjin Zhou, Yan Zhuang. "Blood Lead Level Is Negatively Associated With Bone Mineral Density in U.S. Children and Adolescents Aged 8-19 Years", *Frontiers in Endocrinology*, 2022 29 words — 1%  
Crossref
- 3** Yang Liu, Shizhen Li. "Association between Serum Magnesium Levels and Risk of Dyslipidemia: A Cross-Sectional Study from the China Health and Nutrition Survey", *Biological Trace Element Research*, 2023 28 words — 1%  
Crossref
- 4** Pei-Lun Xiao, Cairen Fuerwa, Chi-Jen Hsu, Rong Peng, Ai-Yong Cui, Ning Jiang, Yong-Guang Ma, Xiang-He Xu, Hua-Ding Lu. "Socioeconomic status influences on bone mineral density in American men: findings from NHANES 2011–2020", *Osteoporosis International*, 2022 26 words — 1%  
Crossref
- 5** X. Hou, F. Tian, L. Guo, Y. Yu, Y. Hu, S. Chen, M. Wang, Z. Yang, J. Wang, X. Fan, L. Xing, S. Wu, N. Zhang. "Remnant cholesterol is associated with hip BMD and low bone mass in young and middle-aged men: a cross-sectional study", *Journal of Endocrinological Investigation*, 2024 24 words — 1%



- 
- 6 Ming Ma, Zhiwei Feng, Xiaolong Liu, Gengxin Jia, Bin Geng, Yayi Xia. "The Saturation Effect of Body Mass Index on Bone Mineral Density for People Over 50 Years Old: A Cross-Sectional Study of the US Population", *Frontiers in Nutrition*, 2021  
Crossref 22 words — 1%
- 
- 7 [pubmed.ncbi.nlm.nih.gov](https://pubmed.ncbi.nlm.nih.gov)  
Internet 18 words — 1%
- 
- 8 [www.ijnrd.org](http://www.ijnrd.org)  
Internet 17 words — < 1%
- 
- 9 [www.mdpi.com](http://www.mdpi.com)  
Internet 17 words — < 1%
- 
- 10 [lipidworld.biomedcentral.com](http://lipidworld.biomedcentral.com)  
Internet 16 words — < 1%
- 
- 11 [www.atsdr.cdc.gov](http://www.atsdr.cdc.gov)  
Internet 16 words — < 1%
- 
- 12 [www.dovepress.com](http://www.dovepress.com)  
Internet 16 words — < 1%
- 
- 13 [bmcesnotes.biomedcentral.com](http://bmcesnotes.biomedcentral.com)  
Internet 14 words — < 1%
- 
- 14 Arndt F Schilling. "Increased Bone Formation in Mice Lacking Apolipoprotein E", *Journal of Bone and Mineral Research*, 02/2005  
Crossref 13 words — < 1%
- 
- 15 [www.frontiersin.org](http://www.frontiersin.org)  
Internet 13 words — < 1%

- 
- 16 [www.researchsquare.com](http://www.researchsquare.com) 13 words — < 1%  
Internet
- 
- 17 Hao Han, Ran Li, Dongming Fu, Hongyou Zhou, Zihao Zhan, Yi'ang Wu, Bin Meng. "Correlation between bone density, bone metabolism markers with lipid metabolism markers and body mass index", BMC Musculoskeletal Disorders, 2024 12 words — < 1%  
Crossref
- 
- 18 [inc.nutfruit.org](http://inc.nutfruit.org) 12 words — < 1%  
Internet
- 
- 19 [pure.eur.nl](http://pure.eur.nl) 11 words — < 1%  
Internet
- 
- 20 [www.heartfailure.onlinejacc.org](http://www.heartfailure.onlinejacc.org) 11 words — < 1%  
Internet
- 
- 21 Aiyong Cui, Peilun Xiao, Jing He, Zhiqiang Fan, Mengli Xie, Long Chen, Yan Zhuang, Hu Wang. "Association between caffeine consumption and bone mineral density in children and adolescent: Observational and Mendelian randomization study", PLOS ONE, 2023 10 words — < 1%  
Crossref
- 
- 22 Li-Na Zhang, An-Xin Lu, Yin Lin, Jing Li, Xi Xu, Chong-Huai Yan, Lin Zhang. "Association between systemic inflammation markers and high blood pressure among children and adolescents: NHANES, 1999-2018", Research Square Platform LLC, 2023 9 words — < 1%  
Crossref Posted Content
- 
- 23 [eurjmedres.biomedcentral.com](http://eurjmedres.biomedcentral.com) 9 words — < 1%  
Internet
-

- 24 Internet 9 words — < 1%
- 
- 25 Jihong Deng, Ruiying Tang, Jiexin Chen, Qian Zhou et al. "Remnant cholesterol as a risk factor for all-cause and cardiovascular mortality in incident peritoneal dialysis patients", Nutrition, Metabolism and Cardiovascular Diseases, 2023  
Crossref 8 words — < 1%
- 
- 26 [jnfh.mums.ac.ir](http://jnfh.mums.ac.ir)  
Internet 8 words — < 1%
- 
- 27 [worldwidescience.org](http://worldwidescience.org)  
Internet 8 words — < 1%
- 
- 28 Dian Chen Zhao, Bin Pan, Song-yi Mo, Jia-hui Li et al. "The increase in low-density lipoprotein cholesterol in total cholesterol is correlated with osteopenia in middle-aged and older adults", Research Square Platform LLC, 2023  
Crossref Posted Content 7 words — < 1%
- 
- 29 Lijun Yuan, Jiong Liu, Zelin Huang, Yang Zhao et al. "Elevated remnant cholesterol increase 6-year T2DM onset risk", Clinica Chimica Acta, 2023  
Crossref 7 words — < 1%
- 
- 30 Sarah E Anderson. "Active play and screen time in US children aged 4 to 11 years in relation to sociodemographic and weight status characteristics: a nationally representative cross-sectional analysis", BMC Public Health, 2008  
Crossref 7 words — < 1%
-

EXCLUDE QUOTES OFF

EXCLUDE BIBLIOGRAPHY OFF

EXCLUDE SOURCES OFF

EXCLUDE MATCHES OFF
