# Supplementary material for: The association between remnant cholesterol and bone mineral density in US adults: the National Health and Nutrition Examination Survey (NHANES) 2013–2018
Source: PubMed Central journal article supplement (PMC11102129; doi:10.1186/s12944-024-02145-6), 2024-05-18
Supplement: 12944_2024_2145_MOESM3_ESM.pdf [file 12944_2024_2145_MOESM3_ESM.pdf]

This document certifies that the manuscript

The association between remnant cholesterol and bone mineral density in US adults: The National Health and Nutrition Examination Survey (NHANES) 2013-2018.

prepared by the authors

Peilun Xiao

was edited for proper English language, grammar, punctuation, spelling, and overall style by one or more of the highly qualified native English speaking editors at SNAS.

This certificate was issued on **May 6, 2024** and may be verified on the [SNAS website](#) using the verification code **6569-C4EE-93F8-DAOD-DF65**.

Neither the research content nor the authors' intentions were altered in any way during the editing process. Documents receiving this certification should be English-ready for publication; however, the author has the ability to accept or reject our suggestions and changes. To verify the final SNAS edited version, please visit our verification page at [secure.authorservices.springernature.com/certificate/verify](https://secure.authorservices.springernature.com/certificate/verify).

If you have any questions or concerns about this edited document, please contact SNAS at [support@as.springernature.com](mailto:support@as.springernature.com).
